# Supplementary material
Source: publisher site journal article supplement (https://spandidos-publications.com/4357/downloadSupplementary)

Figure S1. Kaplan-Meier survival curves for different mouse groups. STZ, saline treated type 1 diabetes group; INS, insulin treatment group; LRG, liraglutide treatment group; INS + LRG, insulin and liraglutide treatment group; NGT, normal glucose tolerance group.

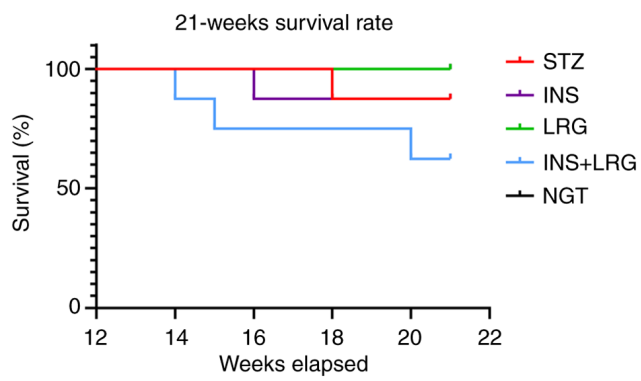

Supplement: Supplementary file 1 [file downloadSupplementary]
